# Supplementary material
Source: PubMed Central journal article supplement (PMC2708752)
Supplement: 0904907106_0904907106SI.pdf [file 0904907106_0904907106SI.pdf]

# Supporting Information

Rizk et al. 10.1073/pnas.0904907106

## SI Methods

**Cell Lines.** U87 human glioblastoma epithelium-like cells (kindly provided by Dr. Maciej Lesniak) were cultured in MEM with penicillin/streptomycin and 10% FBS. Normal human astrocytes (NHA) were purchased from Lonza and cultured in provided astrocyte growth media supplemented with rhEGF, insulin, ascorbic acid, GA-1000, L-glutamine and 5% FBS. HeLa cells were grown in DMEM plus penicillin/streptomycin and with 10% FBS.

**Western Blot Analysis.** NHA and U87 cells were lysed in RIPA buffer (50 mM Tris-HCl, pH 7.4, 150 mM NaCl, 1 mM PMSF, 1 mM EDTA, 1% Triton X-100, 1% sodium deoxycholate, 0.1% SDS, and 5  $\mu\text{g}/\mu\text{L}$  protease inhibitors). Total protein concentrations of the lysates were determined using a BSA Protein Assay Kit (Thermo). For each sample, 20  $\mu\text{g}$  were loaded on 4–20% Tris-HCl gradient gel for separation by SDS-PAGE electrophoresis. The proteins were transferred to Hybond-C Extra nitrocellulose membrane (Thermo) at 90 Volts for 90 min. The membrane was blocked for 1 h in 5% BSA in TBST and incubated overnight at 4 °C with rabbit anti-NK-1R antibody (1:2,000), then incubated with HRP-conjugated anti-rabbit antibody (1:2,000) for 1 h at room temperature. ECL Western Blotting Detection Reagent (Amersham) was used for chemiluminescence signal detection.

**NK-1 Receptor Transfection.** The plasmid coding for the human NK-1 receptor in the mammalian expression vector pCDNA3(+) was kindly provided by Dr. Lefkowitz (Duke University). Transfections were carried out using Lipofectamine 2000 (Invitrogen) according to manufacturer protocol, with 1 ng of the plasmid for each well containing  $10^4$  HeLa cells seeded on an 18-mm cover-slip in a 12-well plate.

**TIRF Microscopy.** Actin was purified from chicken muscle acetone powder as described (26). A total of 10  $\mu\text{M}$  F-actin was polymerized with 10% biotin-G actin (27) and 33% TMR-G actin (28). Glass flow cells (20  $\mu\text{L}$  volume) were washed with 1 mg/mL neutravidin in AB buffer (25 mM KCl, 25 mM imidazole pH 7.5,

1 mM EGTA, 4 mM  $\text{MgCl}_2$ , and 10 mM DTT), followed by blocking with 1 mg/mL BSA in  $1\times$  AB buffer.  $\text{Mg}^{2+}$ -F-actin (200 nM) in AB buffer was added to the flow cells for 2 min. Flow cells were washed with TIRF buffer (AB, 4.3 mg/ml glucose oxidase, 0.7 mg/mL catalase, 4.5 mg/mL glucose, and 0.5% BME) and imaged. sAB-4 (0.5  $\mu\text{M}$ ) or sAB-19-Cy5 (0.25  $\mu\text{M}$ ) were diluted in TIRF buffer and added to the chamber after the start of the movie. Movies were acquired with a 0.2-s exposure for 200 frames.

**Electron Microscopy.** Actin filaments (19.2  $\mu\text{M}$ ) and sAB-27 (6.4  $\mu\text{M}$ ) were incubated together for 5 s, spotted on a holey carbon film (Quantifoil, Cu 400 mesh), washed twice with 0.1 M NaCl, and stained with 1% uranyl acetate. Images were obtained at 75,000 $\times$ .

**Cell-viability Assay.** U87 cells were seeded in 96-well plate at density 5000 cells/well in 0.1 mL growth media. Cells were attached overnight and incubated in starving media for 3 h. Cells were incubated with 20 nM of the SPv- sAB-27 conjugate for 3, 5, 9, 24, and 48 h, and SPv or sAB-27 alone for 48 h in starving media. Twenty  $\mu\text{L}$  of the CellTiter 96 AQ<sub>ueous</sub> assay (Promega) One-Solution reagent was added to each well. The plate was incubated in a humidified, 5%  $\text{CO}_2$  atmosphere until color was developed and the absorbance was recorded at 490 nm.

**Internalization Quantification.** U87 cells were seeded in a 96-well black bottom plate at 5,000 cells/well in 100  $\mu\text{L}$  full growth media. Cells were allowed to attach overnight and then incubated in starving media for 3 h, followed by stimulation with 20 nM, 50 nM, 100 nM, 200 nM, and 500 nM Cy5-labeled sAB-27-SPv conjugate for 24 h in starving media. The cells were extensively washed with PBS to remove residual conjugate from wells. 100  $\mu\text{L}$  of PBS was added to each well and the remaining fluorescence was measured in triplicates using the following parameters: excitation wavelength 640 nm, emission wavelength 675 nm, with 8 nm excitation bandwidth and 15 nm emission bandwidth. A standard curve was used to calculate the concentration of internalized conjugate based on fluorescence values.

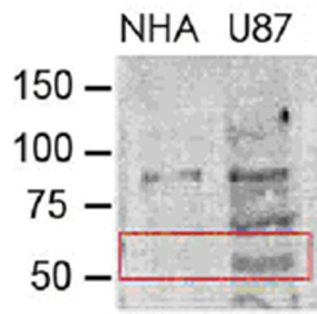

**Fig. S1.** Western blot analysis of NK1R expression in U87 cells and normal human astrocytes. Box indicates the expected size ( $\approx 53$  kDa) of the NK1R. Expression is detected in U87 glioblastoma cells, but not in normal human astrocytes.

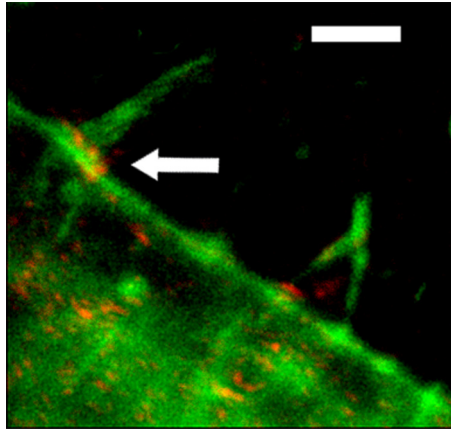

**Fig. S2.** Immunostaining of fixed cells treated with TMR-phalloidin (green) using Alexa 488-labeled sAB-19 (red). Arrow indicates localization of the sAB to the base of filopodia. (Scale bar, 2  $\mu\text{m}$ .)

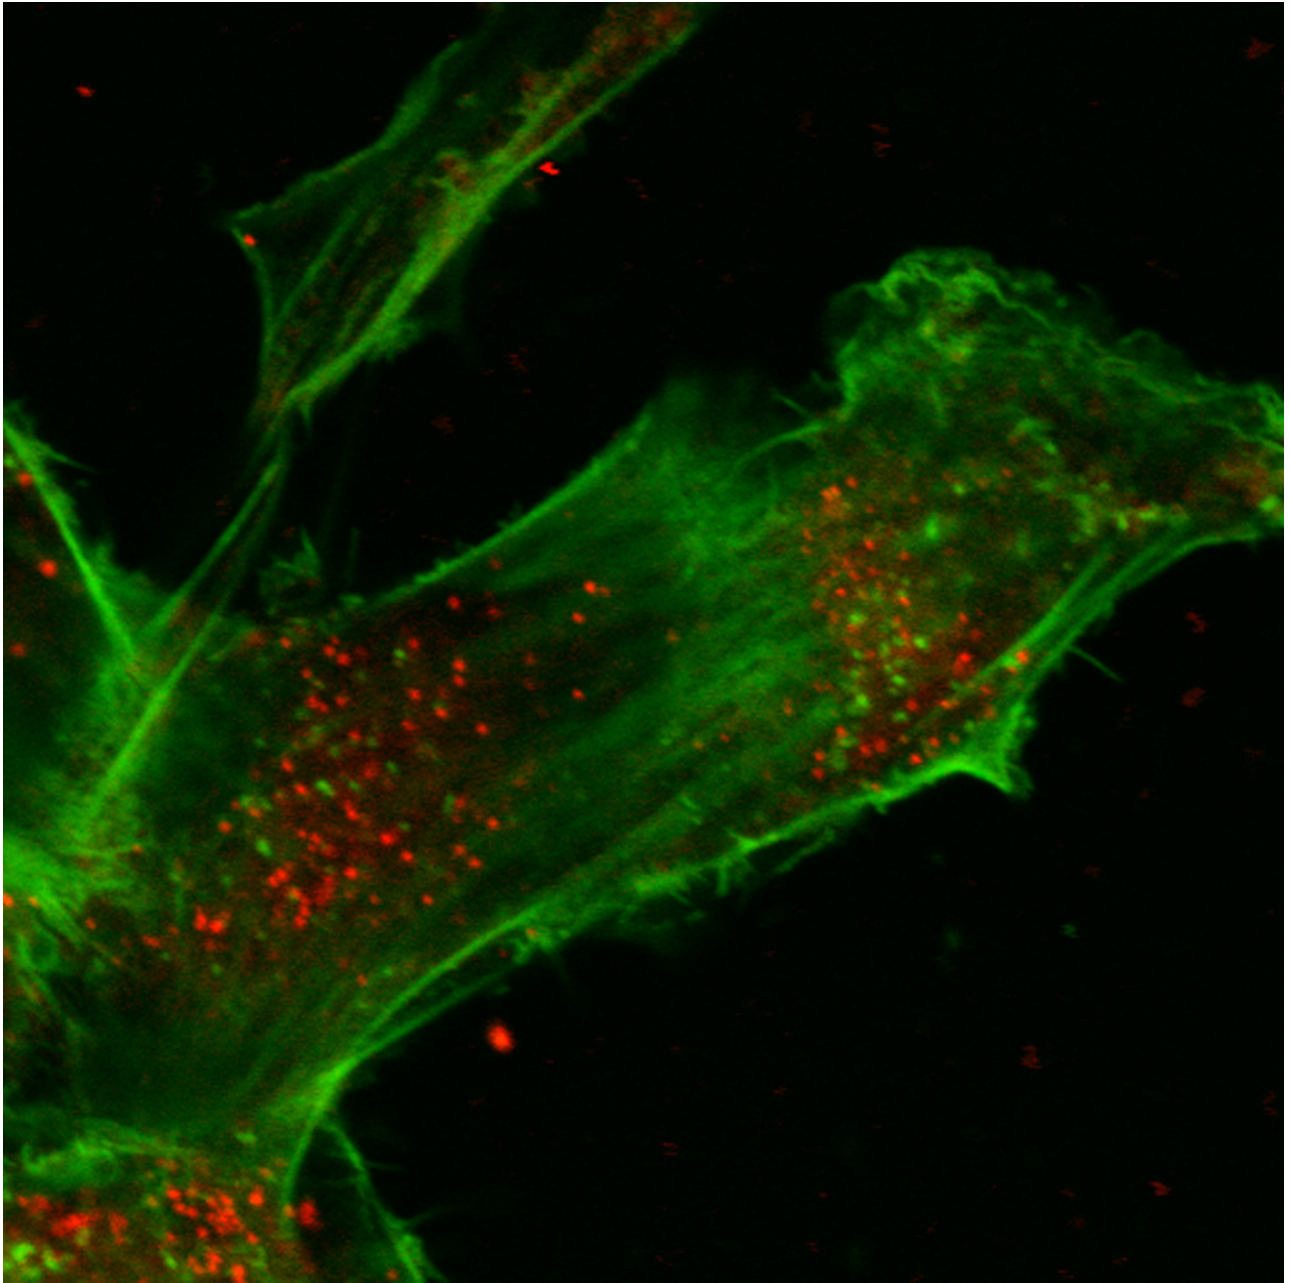

**Movie S1.** A confocal z-series scan of U87 cell after treatment with 20 nM sAB-4-SPv conjugate (red) followed by fixing and staining with phalloidin (green).

[Movie S1](#)
